# Supplementary material for: Stakeholders’ Perceptions towards Land Restoration and Its Impacts on Ecosystem Services: A Case Study in the Chinese Loess Plateau
Source: MDPI journal article supplement (doi:10.3390/land11112076), 2022-11-18
Supplement: s1 [file s1]

## Supplementary S1

Table S1. Change rate of different ecosystem services in 13 counties of Yan'an area from 2000 to 2020.

| Location  | GAP     | FUP       | LVP     | TBP     | CAS    | SDR    | SWY     | HBQ    | OR      |
|-----------|---------|-----------|---------|---------|--------|--------|---------|--------|---------|
| Baota     | -22.98% | 2115.75%  | -14.44% | -95.84% | 7.47%  | 4.99%  | -29.01% | 6.30%  | 7.95%   |
| Yanchang  | 29.47%  | 1790.58%  | 121.90% | -14.85% | 13.60% | 4.94%  | -26.59% | 10.09% | 17.51%  |
| Yanchuan  | -63.13% | 13524.73% | -15.08% | -75.37% | 23.66% | 6.21%  | -11.57% | 9.24%  | 47.87%  |
| Zichang   | -63.65% | 8361.85%  | -42.03% | -94.54% | 43.93% | 6.92%  | -15.84% | 10.92% | 115.26% |
| Ansai     | -35.55% | 188.32%   | 20.12%  | -94.73% | 30.88% | 7.67%  | -43.52% | 12.14% | 91.80%  |
| Zhidan    | 27.48%  | 1783.06%  | 12.07%  | 353.69% | 12.03% | 7.73%  | -46.60% | 8.27%  | 17.24%  |
| Wuqi      | 15.96%  | 1793.83%  | -0.14%  | -99.56% | 18.30% | 7.72%  | -26.76% | 5.34%  | 83.94%  |
| Ganquan   | 35.91%  | 213.99%   | 104.21% | -67.45% | 0.49%  | 0.11%  | -61.31% | 1.69%  | -0.75%  |
| Fu        | -29.68% | 4962.46%  | -47.75% | 94.87%  | -0.30% | -0.07% | -52.00% | -1.32% | 0.43%   |
| Luochuan  | 26.81%  | 825.05%   | 206.58% | -90.62% | 1.07%  | 5.23%  | -14.34% | -0.53% | 2.39%   |
| Yichuan   | -40.70% | 3680.59%  | 7.47%   | -76.18% | 1.01%  | 0.23%  | -22.70% | 3.14%  | 0.05%   |
| Huanglong | 44.81%  | 2166.23%  | -34.47% | -98.37% | 0.35%  | 0.00%  | -30.95% | -0.16% | 0.59%   |
| Huangling | 61.82%  | 1942.09%  | 5.62%   | -95.28% | -0.37% | 0.17%  | -11.02% | -1.76% | -0.05%  |

Source<sup>1</sup>

<sup>1</sup> Chen, H., Fleskens, L., Baartman, J., Wang, F., Moolenaar, S., & Ritsema, C. (2020). Impacts of land use change and climatic effects on streamflow in the Chinese Loess Plateau: A meta-analysis. *Science of the Total Environment*, 703, 134989. <https://doi.org/10.1016/j.scitotenv.2019.134989>

## Supplementary S2

### Questionnaire of farmer's perception on GGP implementation

#### A. Information of household GGP

A1. Did your family participate the GGP?

- a. Yes      b. No

B2. Your household major income before GGP:

- a. Cultivation      b. Others

A3. Year of GGP participation\_\_\_\_\_, type of the restored forest:

- a. Ecological forest      b. economic forest.      please specify the species\_\_\_\_\_

A4. Your household total cultivation land area \_\_\_\_\_Chinese mu, the GGP restored land area\_\_\_\_\_ Chinese mu, the slope angle of restored land:

- a. Flat land      b. < 15°      c. 15-25°      d.>25°

A5. The amount of GGP subsidy you received is \_\_\_\_\_RMB/Chinese mu/year, the duration of subsidy is\_\_\_\_\_ years. Did you receive all the promised subsidy?

- a. All received      b. partly received      c. Not received

A6. The survival rate of your restored GGP forest?

- a. Above 90%      b. 70-90%      c. 50-70%      d. 30-50%      e. below 30%

A7. Have you be required to maintain and re-plant the GGP forest?

- a. Yes      b. No

A8. How many hours did you spend to main the forest \_\_\_\_\_hrs/year, do you agree the maintain work is heavy?

- a. strongly agree      b. agree      c. neutral      d. disagree      e. strongly disagree
- 

#### B. Willingness to participate

B1. Do you agree government force you to participate the GGP?

- a. strongly agree      b. agree      c. neutral      d. disagree      e. strongly disagree

B2. Do you support the implementation of GGP?

- a. strongly support      b. support      c. neutral      d. oppose      e. strongly oppose

B3. Why do you support/oppose the current GGP?

---

B4. How do you consider the current subsidy standard?

- a. very low      b. low      c. neutral      d. high      e. very high

B5. How do you consider the current restored tree species?

- a. very satisfied      b. satisfied      c. neutral      d. unsatisfied      e. very unsatisfied

Your preference of restoration tree species: \_\_\_\_\_.

B6. Do you agree the maintain work of restoration forest is heavy?

- a. very heavy      b. heavy      c. neutral      d. easy      e. very easy

B7. Do you support the next round of GGP in the future?

- a. strongly support      b. support      c. neutral      d. oppose      e. strongly oppose

B8. Why do you support/oppose the future GGP?

---

B9. What changes do you expect for future GGP?

- a. Increase the GGP forest land area  
b. Increase the GGP subsidy standard  
c. Flexibility on choosing the restore forest species  
d. Improve technical support on tree planting  
e. No change expected  
f. Other\_\_\_\_\_

B10. If GGP stop and no more subsidy provide in the future, will you consider re-cultivation on the restored forest?

a. Yes      b. No

Please specify your opinion toward the below statements

|                                                                                | Strongly<br>increase<br>/Agree | Increase<br>/Agree | neutral | Decrease<br>/Disagree | Strongly<br>decrease<br>/Disagree |
|--------------------------------------------------------------------------------|--------------------------------|--------------------|---------|-----------------------|-----------------------------------|
| B11. Relation between GGP and my environmental protection awareness            |                                |                    |         |                       |                                   |
| B12. Relation between GGP and job opportunities of local people                |                                |                    |         |                       |                                   |
| B13. The governmental is of a high efficiency of GGP implementation            |                                |                    |         |                       |                                   |
| B14. Relation between GGP and local tourism industry development               |                                |                    |         |                       |                                   |
| B15. Relation between GGP and my household cohesion with other village members |                                |                    |         |                       |                                   |

### C. Perception of GGP impacts on ecosystem services

Please specify your opinion toward the below statements

|                                                          | Strongly<br>increase | increase | neutral | decrease | Strongly<br>decrease |
|----------------------------------------------------------|----------------------|----------|---------|----------|----------------------|
| C1. Impacts of GGP on your household grain production    |                      |          |         |          |                      |
| C2. Impacts of GGP on your household fruit production    |                      |          |         |          |                      |
| C3. Impacts of GGP on your household livestock number    |                      |          |         |          |                      |
| C4. Impacts of GGP on your household timber availability |                      |          |         |          |                      |
| C5. Impacts of GGP on local sandstorm weather            |                      |          |         |          |                      |
| C6. Impacts of GGP on local soil and water lost          |                      |          |         |          |                      |
| C7. Impacts of GGP on local landslides hazards           |                      |          |         |          |                      |
| C8. Impacts of GGP on local river water quantity         |                      |          |         |          |                      |
| C9. Impacts of GGP on local river water quality          |                      |          |         |          |                      |
| C10. Impacts of GGP on local vegetation cover            |                      |          |         |          |                      |
| C11. Impacts of GGP on local wild animal number          |                      |          |         |          |                      |
| C12. Impacts of GGP on local habitat quality             |                      |          |         |          |                      |
| C13. Impacts of GGP on local tourism number              |                      |          |         |          |                      |

### D. Farmer's behavior and economic impacts

D1. Do you think the participation of GGP bring more free time to the household labour?

a. Yes      b. No

D2. Do you think the participation of GGP caused the out-migration for work of the household labour?

- a. Yes      b. No

D3. Do you think the participation of GGP cause the land abandon to your family?

- a. Yes      b. No

D4. Do you agree GGP implementation had increased your household income?

- a. strongly agree      b. agree      c. neutral      d. disagree      e. strongly disagree

D5. Compare to the time before GGP implementation, the income you obtained from the land had approximately increased/decreased \_\_\_\_\_ RMB/year

D6. What do you think is the biggest impacts of GGP on your household family?

- a. Change of household income      b. Farming habit  
c. Living habit      d. Surrounding ecological environment  
e. No impacts      f. Other \_\_\_\_\_
- 

#### E. Basic information

E1. Gender: \_\_\_\_\_.

E2. Age: \_\_\_\_\_.

E3. Years of education: \_\_\_\_\_.

E4. Householder number: \_\_\_\_\_, adult male number: \_\_\_\_\_.

E5. Village location: \_\_\_\_\_, years of living in this area: \_\_\_\_\_.

E6. Your main household income source:

- a. Cultivation (\_\_\_\_\_)      b. other (\_\_\_\_\_)

E7. Your household family income:

- a. Below 1000 RMB      b. 1000 – 3000 RMB      c. 3000 – 5000 RMB  
d. 5000 – 10,000 RMB      e. 10,000 – 20,000 RMB      f. above 20,000RMB

Notes:

---

---

### Supplementary S3

#### Questionnaire of stakeholder's perception on GGP implementation

##### A. Perceptions on GGP

A1. Explain your knowledge on the current GGP policy:

- a. Extremely understand
- b. Normal understand
- c. Somehow understand
- d. Not understand

A2. Do you agree the implementation of GGP had influences to your life?

- a. strongly agree      b. agree      c. neutral      d. disagree      e. strongly disagree

A3. Do you support the implementation of GGP?

- b. strongly support      b. support      c. neutral      d. oppose      e. strongly oppose

A4. Why do you support/oppose the GGP implementation:

---

A6. Do you support the next round of GGP in the future?

- b. strongly support      b. support      c. neutral      d. oppose      e. strongly oppose

A7. Please specify the reason of your agreement/disagreement to next round of GGP

---

A8. What changes do you expect for future GGP?

- g. Increase the GGP forest land area
- h. decrease the GGP forest land area
- i. change the restore forest species
- j. Improve subsidy for farmers
- k. No change expected
- l. Other\_\_\_\_\_

Please specify your opinion toward the below statements

|                                                                    | Strongly<br>increase<br>/Agree | Increase<br>/Agree | neutral | Decrease<br>/Disagree | Strongly<br>decrease<br>/Disagree |
|--------------------------------------------------------------------|--------------------------------|--------------------|---------|-----------------------|-----------------------------------|
| B11. Impacts of GGP on my environmental protection awareness       |                                |                    |         |                       |                                   |
| B12. Impacts of GGP on local job opportunities                     |                                |                    |         |                       |                                   |
| B13.The governmental is of a high efficiency of GGP implementation |                                |                    |         |                       |                                   |
| B14. Impacts of GGP on local tourism industry development          |                                |                    |         |                       |                                   |
| B15. Impacts of GGP on local population outmigration               |                                |                    |         |                       |                                   |
| Impacts of GGP on local economic development                       |                                |                    |         |                       |                                   |
| Impacts of GGP on local farmer land abandon                        |                                |                    |         |                       |                                   |

## B. Perception of GGP impacts on ecosystem services

Please specify your opinion toward the below statements

|                                                  | Strongly<br>increase | increase | neutral | decrease | Strongly<br>decrease |
|--------------------------------------------------|----------------------|----------|---------|----------|----------------------|
| C1. Impacts of GGP on local grain production     |                      |          |         |          |                      |
| C2. Impacts of GGP on local fruit production     |                      |          |         |          |                      |
| C3. Impacts of GGP on local livestock number     |                      |          |         |          |                      |
| C4. Impacts of GGP on local timber availability  |                      |          |         |          |                      |
| C5. Impacts of GGP on local sandstorm weather    |                      |          |         |          |                      |
| C6. Impacts of GGP on local soil and water lost  |                      |          |         |          |                      |
| C7. Impacts of GGP on local landslides hazards   |                      |          |         |          |                      |
| C8. Impacts of GGP on local river water quantity |                      |          |         |          |                      |
| C9. Impacts of GGP on local river water quality  |                      |          |         |          |                      |
| C10. Impacts of GGP on local vegetation cover    |                      |          |         |          |                      |
| C11. Impacts of GGP on local wild animal number  |                      |          |         |          |                      |
| C12. Impacts of GGP on local habitat quality     |                      |          |         |          |                      |
| C13. Impacts of GGP on local tourism number      |                      |          |         |          |                      |

## C. Basic information

C1. Your gender: a. Male b. Female

C2. Age: \_\_\_\_\_, Education level: \_\_\_\_\_.

C4. Living area: \_\_\_\_\_ county \_\_\_\_\_ town \_\_\_\_\_ village.

C5. Your occupation:

a. Governmental officer

b. Citizen

c. Tourism practitioner

d. Forestry practitioner e. Other\_\_\_\_\_

E7. Your household family income:

- |                      |                        |                    |
|----------------------|------------------------|--------------------|
| b. Below 1000 RMB    | b. 1000 – 3000 RMB     | c. 3000 – 5000 RMB |
| d. 5000 – 10,000 RMB | e. 10,000 – 20,000 RMB | f. above 20,000RMB |

Note:

---



#### Supplementary 4

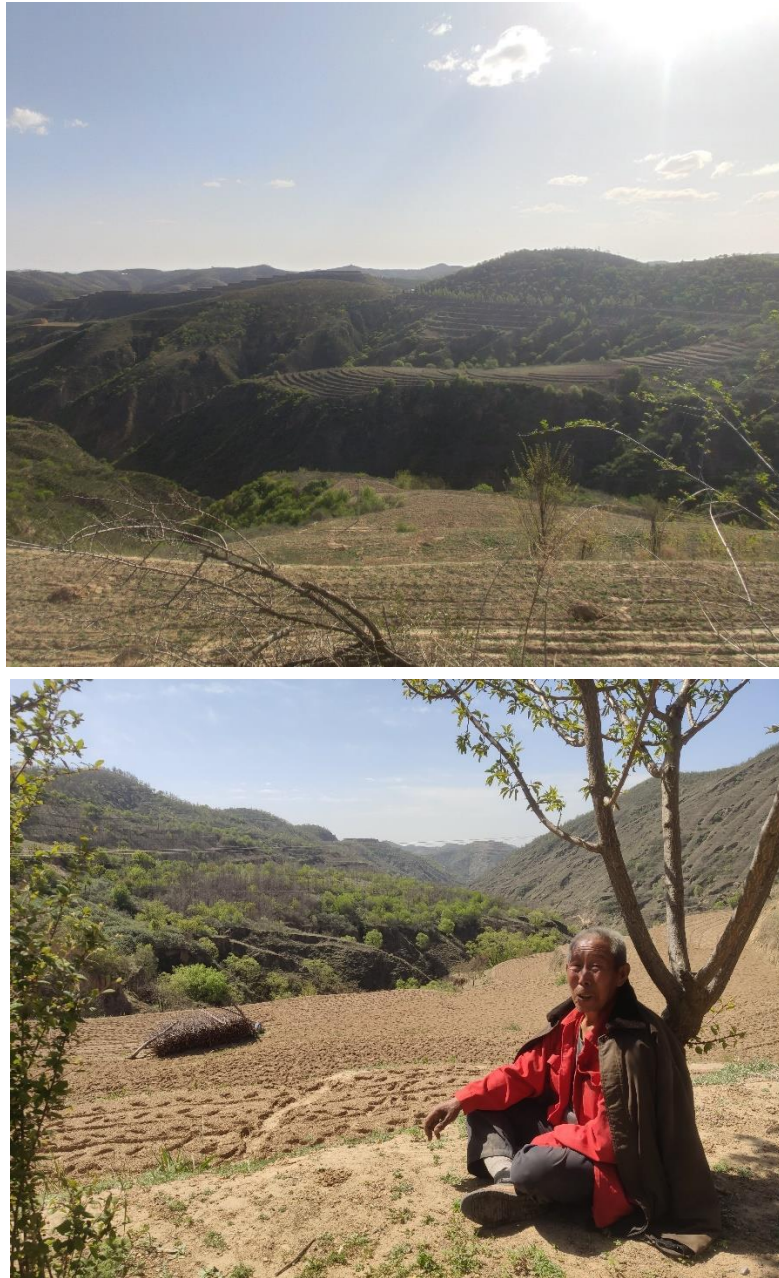

Figure S1. Landscape of the research area and farmer in the restored forest, photoed by H.Chen, with permission from the farmer of phtotgraph and utilization for scientific purpose.
